# Supplementary material for: Thyme Antimicrobial Effect in Edible Films with High Pressure Thermally Treated Whey Protein Concentrate
Source: PubMed Central journal article supplement (PMC7404695; doi:10.3390/foods9070855), 2020-06-30
Supplement: foods-09-00855-s001.pdf [file foods-09-00855-s001.pdf]

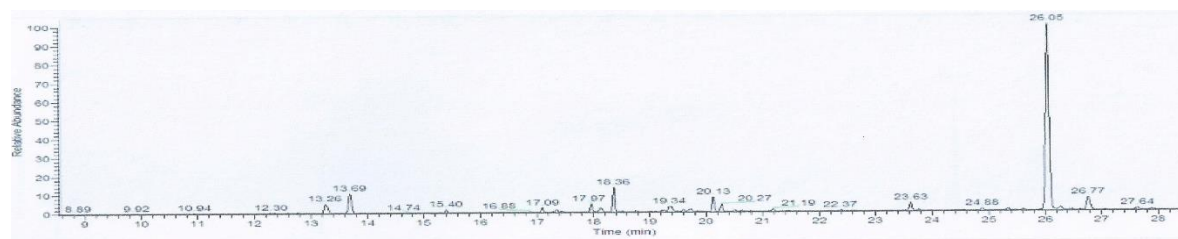

**Figure S1.** Volatile fingerprint of TT-WPC-EF in the beginning of storage.

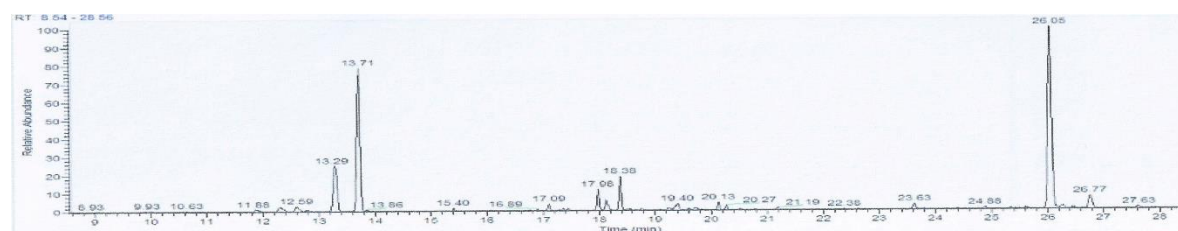

**Figure S2.** Volatile fingerprint of HPT-WPC-EF in the beginning of storage

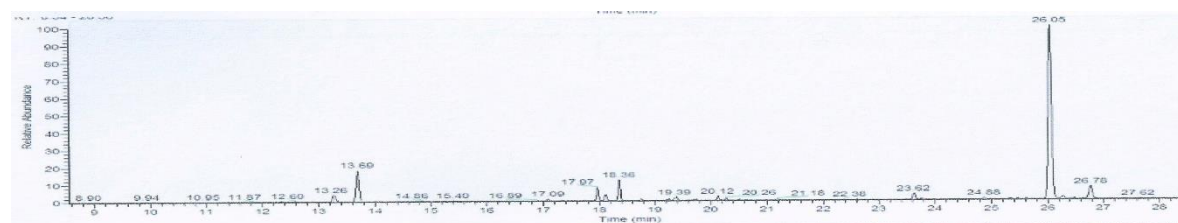

**Figure S3.** Volatile fingerprint of TT-WPC-EF after 10 days of storage

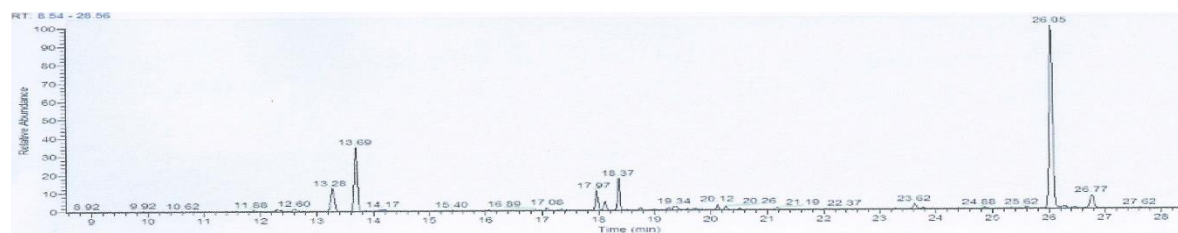

**Figure S4.** Volatile fingerprint of HPT-WPC-EF after 10 days of storage
